# Supplementary material for: Delivering the WISE (Whole Systems Informing Self-Management Engagement) training package in primary care: learning from formative evaluation
Source: Springer Nature journal article supplement (doi:10.1186/1748-5908-5-7), 2010-01-29
Supplement: Additional file 3 [file 1748-5908-5-7-s3.doc]

**Suggested options for self care support**

- Information sources
  - Web based information
  - Guidebooks
- Group training and support
  - EPP courses
  - Group education
  - Exercise classes
- Voluntary sector and local support
  - Patient support groups
  - Health trainers
